# Supplementary material
Source: PubMed Central journal article supplement (PMC6055168)
Supplement: pnas.1719451115.sapp.pdf [file pnas.1719451115.sapp.pdf]

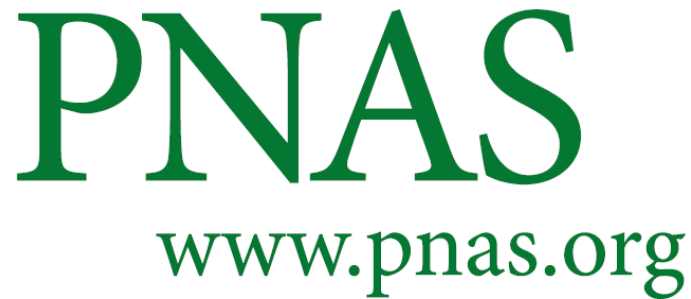

Supplementary Information for

**Lifelong CMV infection improves immune defense in old mice by  
broadening the mobilized TCR repertoire against third-party infection**

Megan J. Smithey<sup>\*#</sup>, Vanessa Venturi<sup>†</sup>, Miles P. Davenport<sup>†</sup>, Adam S.  
Buntzman<sup>&</sup>, Benjamin G. Vincent<sup>§</sup>, Jeffrey A. Frelinger<sup>\*</sup>, and Janko Nikolich-  
Zugich<sup>\*#</sup>

Corresponding Author: Janko Nikolich-Zugich  
Email: [nikolich@email.arizona.edu](mailto:nikolich@email.arizona.edu)

**This PDF file includes:**

Figs. S1 to S4  
Tables S1 to S2  
Dataset S1

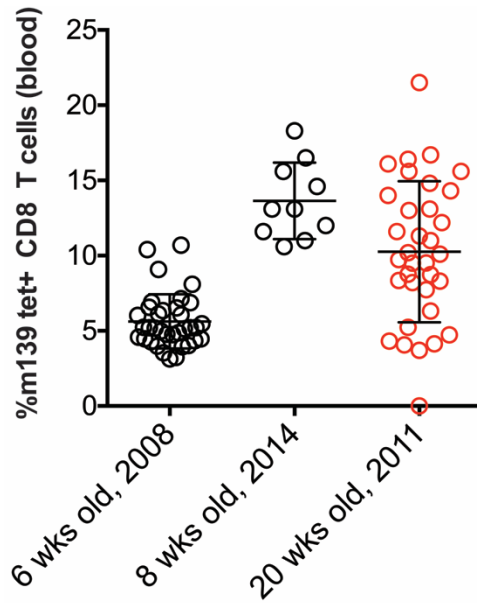

**Fig. S1. Age of MCMV infection does not determine the magnitude of memory inflation over the lifespan.** Steady state memory inflation in 17 month old mice was monitored in groups that had been infected with MCMV at 6, 8, or 20 weeks of age (n=35, n=10, n=34 respectively). Animals in the red dataset were used for this manuscript.

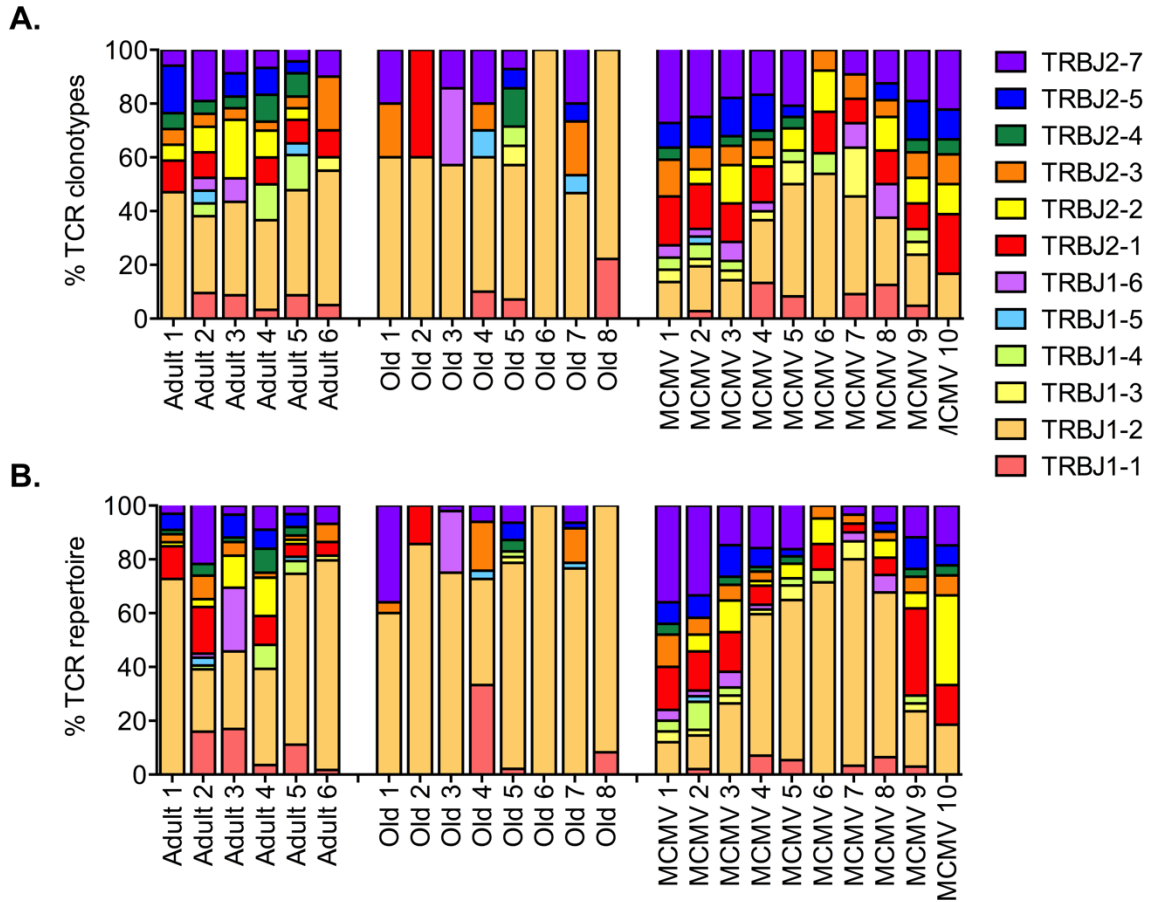

**Fig. S2. MCMV+ mice show increased variability in their TRBJ gene choice.**

Utilization of different TRBJ genes for the unique clonotypes (A) and the total repertoire (B) for each individual adult, old, and MCMV+ mouse are shown.

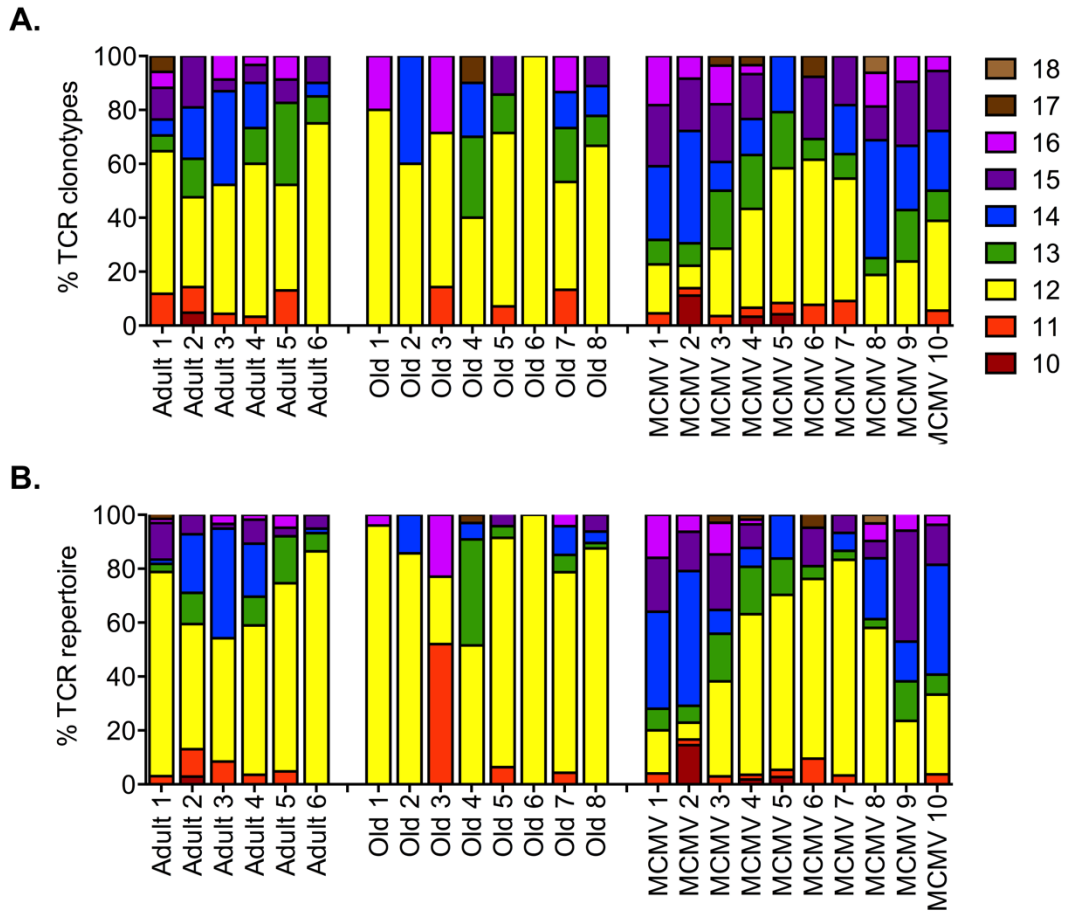

**Fig. S3. MCMV+ mice show high variability in their CDR3 lengths in the OVA-specific TRBV12+ repertoire.** The CDR3 amino acid length for unique clonotypes (A) and the total repertoire (B) for each individual adult, old, and MCMV+ mouse is shown.

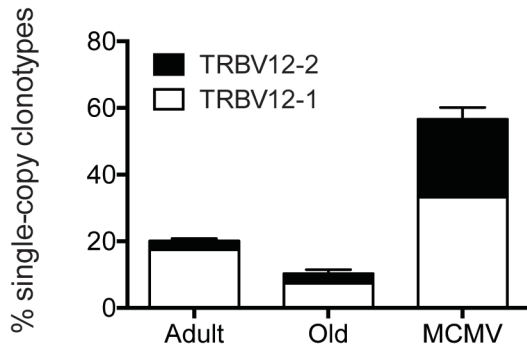

**Fig. S4. Aging with MCMV infection results in the recruitment of many “single-copy” clonotypes into the OVA-specific repertoire.** The frequency of clonotypes present as “single-copy” within the TRBV12-1+ or TRBV12-2+ OVA-specific CD8 repertoires of adult old, and MCMV+ old mice.

**Table S1. Summary of the data used to compare TRBV12+ TCR $\beta$  clonotypes (amino acid sequences) for the OVA-specific CD8 T cell response to Lm-OVA infection in adult, old, and old mice with lifelong-MCMV infection (“MCMV”).**

| <b>Parameter</b>                                      | <b>Adult<br/>(12 wk old)</b> | <b>Old<br/>(20 mo old)</b> | <b>MCMV+<br/>(20 mo old,<br/>15 w/ MCMV)</b> |
|-------------------------------------------------------|------------------------------|----------------------------|----------------------------------------------|
| Number of mice                                        | 6                            | 8                          | 10                                           |
| Total number of TCR $\beta$ sequences across all mice | 372                          | 325                        | 344                                          |
| Range of number of TCR $\beta$ sequences per mouse    | 56-69                        | 25-48                      | 21-57                                        |
| Mean number of TCR $\beta$ sequences per mouse        | 62                           | 40.4                       | 34.4                                         |

**Table S2. Examples of alignments of TCR sequences with the TCR genes,** showing the extent of germline encoding of the PR motif for several shared clonotypes, including some using genes other than TRBJ1-2. Blue =TRBV encoded, green = TRBJ encoded, red = TRBD encoded, black = non-template additions.

|                                                         |     |     |     |     |     |     |     |     |     |     |     | No. of n-<br>additions | No. of<br>mice |
|---------------------------------------------------------|-----|-----|-----|-----|-----|-----|-----|-----|-----|-----|-----|------------------------|----------------|
| C                                                       | A   | S   | S   | P   | R   | A   | S   | D   | Y   | T   | F   |                        | 10             |
| tgt                                                     | gcc | agc | tcc | ccc | agg | gcc | tcc | gac | tac | acc | ttc | 4                      | 4              |
| tgt                                                     | gcc | agc | tct | ccc | agg | gcc | tcc | gac | tac | acc | ttc | 2                      | 3              |
| tgt                                                     | gcc | agc | tct | cca | cgg | gcc | tcc | gac | tac | acc | ttc | 3                      | 2              |
| tgt                                                     | gcc | agc | tcc | ccc | cgg | gcc | tcc | gac | tac | acc | ttc | 5                      | 2              |
| tgt                                                     | gcc | agc | tct | ccc | agg | gcc | tcc | gac | tac | acc | ttc | 4                      | 1              |
| C                                                       | A   | S   | S   | P   | R   | A   | T   | D   | Y   | T   | F   |                        | 9              |
| tgt                                                     | gcc | agc | tct | ccg | cgg | gct | acc | gac | tac | acc | ttc | 5                      | 9              |
| tgt                                                     | gcc | agc | tct | ccg | cgg | gcg | acc | gac | tac | acc | ttc | 5                      | 1              |
| C                                                       | A   | S   | S   | P   | R   | D   | S   | D   | Y   | T   | F   |                        | 9              |
| tgt                                                     | gcc | agc | tct | ccc | agg | gac | tcc | gac | tac | acc | ttc | 1                      | 4              |
| tgt                                                     | gcc | agc | tct | cca | agg | gac | tcc | gac | tac | acc | ttc | 2                      | 3              |
| tgt                                                     | gcc | agc | tcc | ccc | agg | gac | tcc | gac | tac | acc | ttc | 3                      | 3              |
| tgt                                                     | gcc | agc | tct | ccc | agg | gat | tcc | gac | tac | acc | ttc | 3                      | 1              |
| tgt                                                     | gcc | agc | tcc | ccc | cgg | gac | tcc | gac | tac | acc | ttc | 5                      | 1              |
| tgt                                                     | gcc | agc | tcc | ccc | cgg | gac | tcc | gac | tac | acc | ttc | 6                      | 1              |
| C                                                       | A   | S   | S   | P   | R   | G   | P   | D   | Y   | T   | F   |                        | 7              |
| tgt                                                     | gcc | agc | tcc | ccc | aga | ggg | ccc | gac | tac | acc | ttc | 7                      | 2              |
| tgt                                                     | gcc | agc | tct | ccc | agg | gga | ccc | gac | tac | acc | ttc | 3                      | 1              |
| tgt                                                     | gcc | agc | tct | ccc | cgg | ggg | ccc | gac | tac | acc | ttc | 3                      | 1              |
| tgt                                                     | gcc | agc | tct | ccc | cgg | gga | ccc | gac | tac | acc | ttc | 4                      | 1              |
| tgt                                                     | gcc | agc | tct | cct | agg | gga | ccc | gac | tac | acc | ttc | 4                      | 1              |
| tgt                                                     | gcc | agc | tcc | ccc | agg | gga | ccc | gac | tac | acc | ttc | 5                      | 1              |
| tgt                                                     | gcc | agc | tct | ccc | cgc | ggg | ccc | gac | tac | acc | ttc | 5                      | 1              |
| C                                                       | A   | S   | S   | P   | R   | G   | T   | D   | Y   | T   | F   |                        | 5              |
| tgt                                                     | gcc | agc | tct | ccc | cgg | ggg | acc | gac | tac | acc | ttc | 4                      | 4              |
| tgt                                                     | gcc | agc | tct | ccg | cgg | ggt | acc | gac | tac | acc | ttc | 5                      | 2              |
| tgt                                                     | gcc | agc | tct | ccc | cgg | ggc | acc | gac | tac | acc | ttc | 4                      | 1              |
| tgt                                                     | gcc | agc | tct | ccc | cgg | gga | acc | gac | tac | acc | ttc | 5                      | 1              |
| tgt                                                     | gcc | agc | tct | ccc | cgg | ggt | acc | gac | tac | acc | ttc | 5                      | 1              |
| C                                                       | A   | S   | S   | P   | R   | N   | S   | D   | Y   | T   | F   |                        | 5              |
| tgt                                                     | gcc | agc | tct | ccc | agg | aac | tcc | gac | tac | acc | ttc | 1                      | 3              |
| tgt                                                     | gcc | agc | tcc | ccc | aga | aac | tcc | gac | tac | acc | ttc | 3                      | 1              |
| tgt                                                     | gcc | agc | tcg | cca | aga | aac | tcc | gac | tac | acc | ttc | 4                      | 1              |
| tgt                                                     | gcc | agc | tct | cca | aga | aac | tcc | gac | tac | acc | ttc | 2                      | 1              |
| C                                                       | A   | S   | S   | P   | R   | K   | T   | D   | Y   | T   | F   |                        | 5              |
| tgt                                                     | gcc | agc | tct | ccc | cga | aag | acc | gac | tac | acc | ttc | 7                      | 5              |
| TRBV12-1                                                | tgt | gcc | agc | tct | ctc |     |     |     |     |     |     |                        |                |
| TRBD1: <b>gggacagggggc</b> TRBD2: <b>gggactgggggggc</b> |     |     |     |     |     |     |     |     |     |     |     |                        |                |
| ca aac tcc gac tac acc ttc                              |     |     |     |     |     |     |     |     |     |     |     | TRBJ1-2                |                |
| C                                                       | A   | S   | S   | P   | R   | N   | T   | E   | V   | T   | F   |                        | 4              |
| tgt                                                     | gcc | agc | tct | cca | cga | aac | aca | gaa | gtc | ttc | ttt | 2                      | 3              |
| tgt                                                     | gcc | agc | tcc | ccg | aga | aac | aca | gaa | gtc | ttc | ttt | 4                      | 1              |
| TRBV12-1                                                | tgt | gcc | agc | tct | ctc |     |     |     |     |     |     |                        |                |
| TRBD1: <b>gggacagggggc</b> TRBD2: <b>gggactgggggggc</b> |     |     |     |     |     |     |     |     |     |     |     |                        |                |
| ca aac aca gaa gtc ttc ttt                              |     |     |     |     |     |     |     |     |     |     |     | TRBJ1-1                |                |
| C                                                       | A   | S   | S   | P   | R   | E   | D   | T   | Q   | Y   | F   |                        | 3              |
| tgt                                                     | gcc | agc | tct | ccc | cgg | gaa | gac | acc | cag | tac | ttt | 3                      | 1              |
| tgt                                                     | gcc | agc | tcc | ccc | agg | gaa | gac | acc | cag | tac | ttt | 3                      | 1              |
| tgt                                                     | gcc | agc | tcc | ccg | cga | gaa | gac | acc | cag | tac | ttt | 4                      | 1              |
| TRBV12-1                                                | tgt | gcc | agc | tct | ctc |     |     |     |     |     |     |                        |                |
| TRBD1: <b>gggacagggggc</b> TRBD2: <b>gggactgggggggc</b> |     |     |     |     |     |     |     |     |     |     |     |                        |                |
| aac caa gac acc cag tac ttt                             |     |     |     |     |     |     |     |     |     |     |     | TRBJ2-5                |                |



**Dataset S1. OVA-specific CDR3 sequences recovered from all animals.**
